# Supplementary material for: A label-free optical whole-cell Escherichia coli biosensor for the detection of pyrethroid insecticide exposure
Source: PubMed Central journal article supplement (PMC6713742; doi:10.1038/s41598-019-48907-6), 2019-08-28
Supplement: 41598_2019_48907_MOESM1_ESM.pdf [file 41598_2019_48907_MOESM1_ESM.pdf]

## Supplementary Information

### **A label-free optical whole-cell *Escherichia coli* biosensor for the detection of pyrethroid insecticide exposure**

Pinpunya Riangrunroj<sup>1,2</sup>, Candace Spier Bever<sup>3</sup>, Bruce D. Hammock<sup>4</sup>, Karen M. Polizzi<sup>2,5,\*</sup>

<sup>1</sup> *Department of Life Sciences, Imperial College London, London, SW7 2AZ, UK*

<sup>2</sup> *Imperial College Centre for Synthetic Biology, Imperial College London, London, SW7 2AZ, UK*

<sup>3</sup> *Foodborne Toxin Detection and Prevention Unit, Western Regional Research Center, Agricultural Research Service, United States Department of Agriculture, Albany, CA 94710, USA*

<sup>4</sup> *Department of Entomology and UCD Cancer Center, University of California, Davis, California 95616, United States*

<sup>5</sup> *Department of Chemical Engineering, Imperial College London, London, SW7 2AZ, UK*

\* Corresponding author

E-mail address: [k.polizzi@imperial.ac.uk](mailto:k.polizzi@imperial.ac.uk) (K.M. Polizzi)

Phone: (44) 02075942851

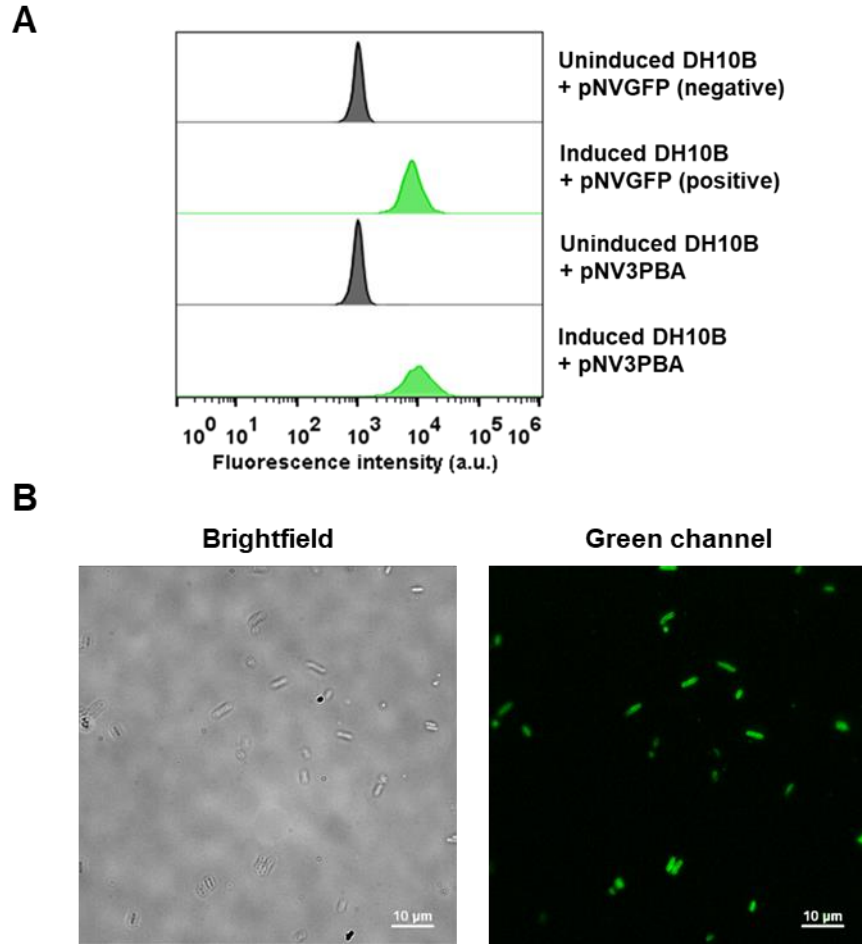

**Figure S11.** The cell surface expression of VHH3-PBA. (A). Flow cytometry analysis of *E. coli* DH10B cells displaying VHH3-PBA on the surface. Cells labelled with anti-Myc-Tag (9B11) Mouse mAb (Alexa Fluor® 488 conjugate) were excited by a 488-nm blue laser and detecting through a 530/30 band-pass filter (BL1-H). Data were analyzed using the FlowJo software tool. (B). The brightfield and green fluorescent images of the antibody-bound cells were taken using a 60x objective at 100 ms exposure time using a laser with 488 nm excitation.

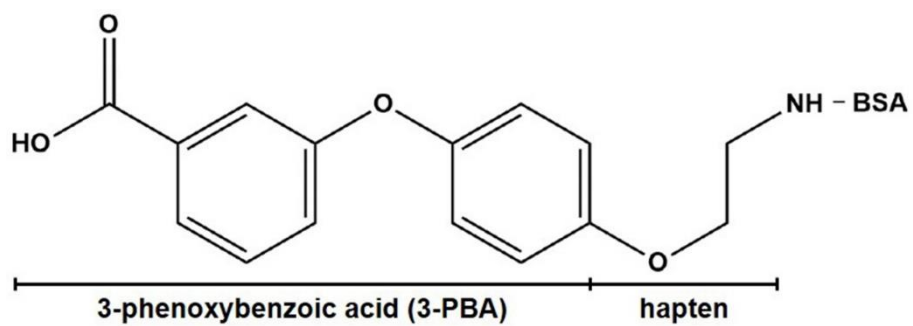

**Figure S12.** Structure of 3-PBA hapten-BSA (cAg01). Hapten linker was attached to the 4-position of the distal phenyl group of 3-PBA and primary amine of lysine residue in BSA molecule.<sup>1</sup>

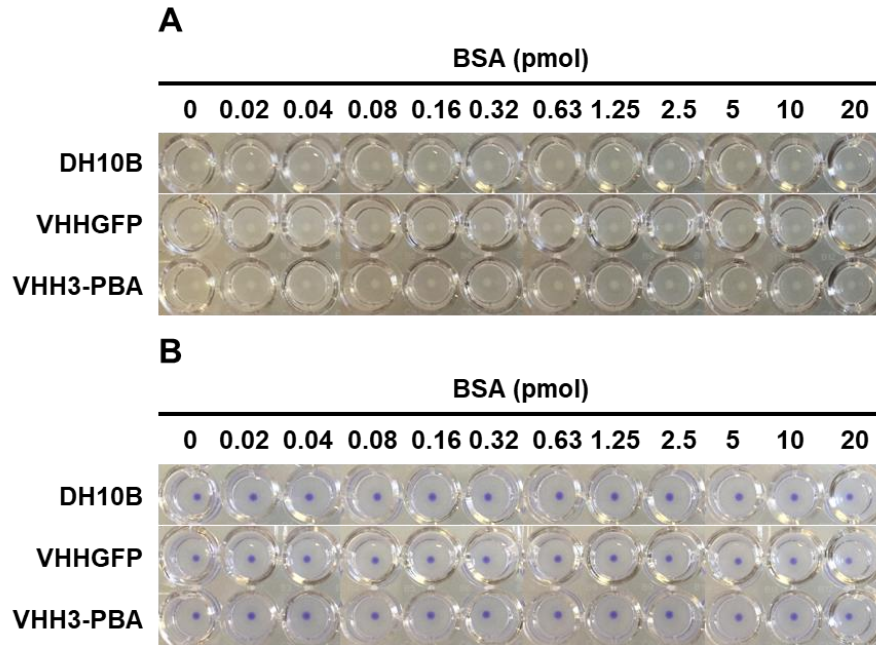

**Figure S13.** BSA has no effect on the cell agglutination reaction. *E. coli* DH10B cells displaying VHH3-PBA in the absence (A) and presence (B) of amilCP were mixed with BSA at concentrations equivalent to those of 3-PBA hapten-BSA in the experiments. The reactions were statically incubated at room temperature for 16 h before observation. Pictures are a composite of photos that were taken every three or six wells per frame using a phone camera. This experiment was carried out in three technical replicates.

**A**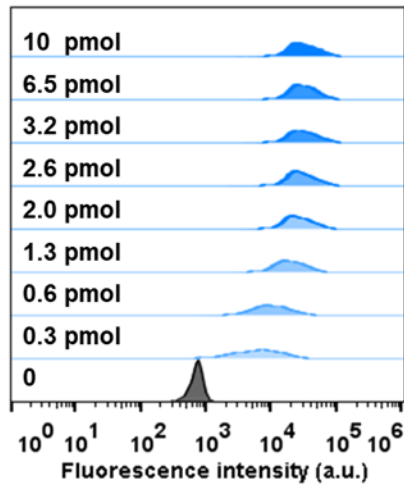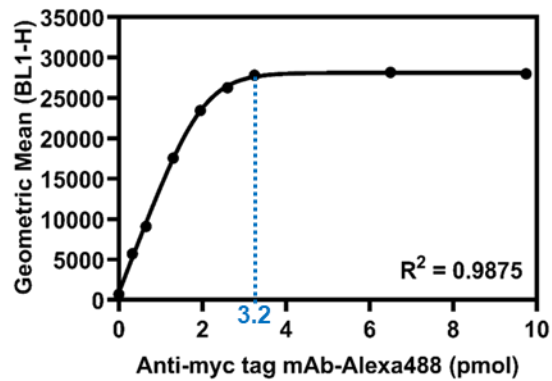**B**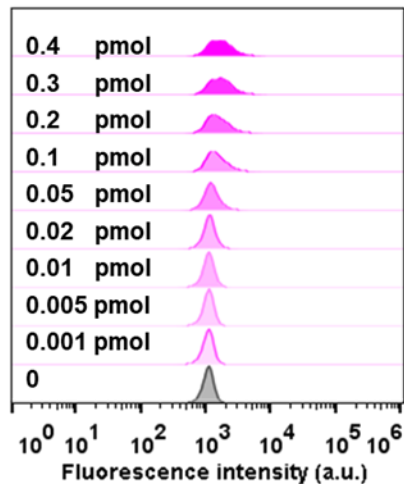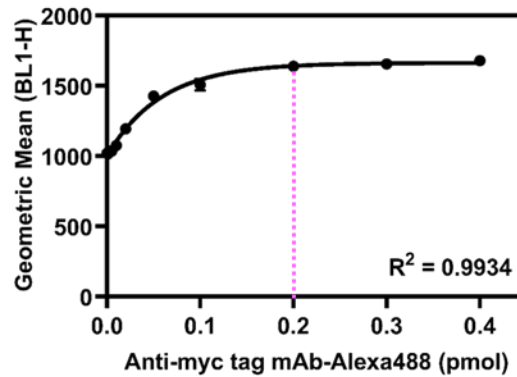

**Figure S14.** Quantification of VHH3-PBA displayed on the surface of *E. coli* DH10B carrying pNV3PBA original (A) and V2 constructs (B) in the presence of amilCP. The induced cells were labelled with various amounts of the anti-Myc-Tag (9B11) Mouse mAb (Alexa Fluor® 488 conjugate) and then analyzed by flow cytometry. From left to right, histograms of the cell fluorescence intensity and the plotted curve of geometric means against the labelling antibody amounts was fitted using a non-linear least squares regression model in Prism 7 software (GraphPad). Dotted lines represent the initial point of the plateau assuming full occupancy of the labelled VHH. Mean and standard deviation were analyzed from three biological triplicates.

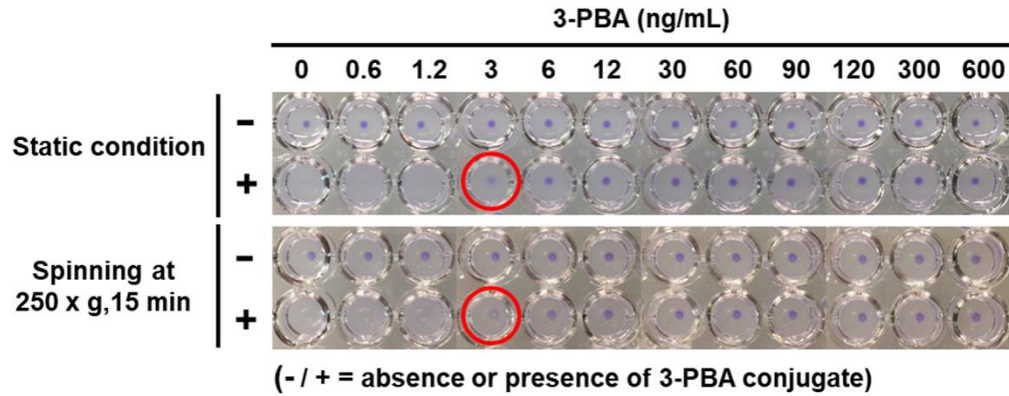

**Figure S15.** Minimizing the analysis time by centrifugation. *E. coli* DH10B cells expressing VHH3-PBA (V2 construct) and amilCP were mixed without (-) or with (+) 0.04 pmol of 3-PBA hapten-BSA and various concentrations of 3-PBA diluted in PBS and statically incubated at room temperature for 10 min prior to spinning at 250 x g for 15 min. The standard analysis procedure with 16 h static incubation at room temperature was included as a control (top rows). Red circles represent minimum concentrations causing cell pellet. Pictures are a composite of photos that were taken six wells per frame using a phone camera.

## Sequences of the plasmids used in this study

### pNV3PBA

This plasmid was constructed using pNVgfp as a template<sup>2</sup> with the replacement of VHHgfp with VHH3PBA, amplified from pComb3xSS.<sup>3</sup>

lacI-plac promoter-NV fusion (IntiminEHEC-E-tag-VHH3PBA-myc-tag)-CmR-pBR322 ori

```
ACCCGACACCATCGAATGGCGCAAACCTTTTCGCGGTATGGCATGATAGCGCCGGAAGAGAGTCAATTCAGGGTGGTGAATGTGAAACCAGTAACG
TTATACGATGTCGCAGAGTATGCCGGTGTCTCTTATCAGACCGTTTCCCGCGTGGTGAACCAGGCCAGCCACGTTTCTGCGAAAACGCGGGAAAAAG
TGGAAAGCGCGCATGGCGGAGCTGAATTACATTCCCAACCGCGTGGCACAACAACCTGGCGGGCAAACAGTCGTTGCTGATTGGCGTTGCCACCTCCAG
TCTGGCCCTGCACGCGCGTTCGCAAATTGTTCGCGCGGATTAATCTCGCGCCGATCAACTGGGTGGTGGTGTTCGATGGTGAACGAAGC
GGCGTCGAAGCCTGTAAAGCGGGGTGCACAATCTTCTCGCGCAACGCGTCAGTGGGCTGATCATTAACTATCCGCTGGATGACCAGGATGCCATTG
CTGTGGAAGCTGCCTGCCTAATGTTCCGGCGTATTTCTTGTATGTCCTGACCAGACACCCATCAACAGTATTATTTCTCCCATGAAGACGGTAC
GCGACTGGGCGTGGAGCATCTGGTGCATTTGGTCCAGCAAATCGCGCTGTAGCGGGCCCATTAAGTTCTGTCTCGGCGCGTCTGCGTCTGGCT
GGCTGGCATAAATATCTCACTCGCAATCAAATTCAGCCGATAGCGGAACGGGAAGGCGACTGGAGTGCCATGTCCGGTTTTCAACAAACCATGCAAA
TGCTGAATGAGGGCATCGTTCCCACTGCGATGCTGGTTGCCAACGATCAGATGGCGCTGGGCGCAATGCGCGCCATTACCGAGTCCGGGCTGCGCGT
TGGTGGGACATCTCGGTAGTGGGATACGACGATACCGAAGACAGCTCATGTTATATCCCGCGTTAACCCACCATCAAACAGGATTTTCGCCCTGCTG
GGGCAAACCAGCGTGGACCGCTTGTGCAACTCTCTCAGGGCCAGGCGGTGAAGGGCAATCAGCTGTGCCCGTCTCACTGGTAAAAAGAAAAACCA
CCCTGGCGCCCAATACGCAAACCGCCTCTCCCGCGCGTGGCCGATTCATTAATGCAGCTGGCACGACAGGTTCCCGACTGGAAGCGGGCAGTG
AGCGGTACCCGATAAAAGCGGCTTCCTGACAGGAGGCGGTTTTGTTTTGCAGCCACCTCAACGCAATTAATGTGAGTTAGCTCACTCATTAGGCAC
CCCAGGCCTTACACTTTATGCTTCGGGCTCGTATGTTGTGGAAATGTGAGCGGATAACAATTCACACAGGAAACAGCTATGACCATGATTACGA
ATTCTAGATAACGAGGGCAAATCATGATTACTCATGGTTGTTATACCCGGACCCGGCACAAGCATAAGCTAAAAAAAACATTGATTATGCTTAGTG
CTGGTTTAGGATGTTTTTTTTATGTTAATCAGAATTCATTTGCAAATGGTGAATAATTTTTAAATTGGGTTGGGATTCAAACTGTTAACTCATGA
TAGCTATCAGAATCGCCTTTTTTATACGTTGAAAACCTGGTGAACCTGTGCGCATCTTCTAAATCGAAGATATTAATTTATCGACGATTTGGTCCG
TTGAATAAGCATTATACAGTCTGAAAGCGAAATGATGAAGGCCGCGCTGGTGCAGAGATCATTTTGCCACTCAAAAAACTTCCCTTTGAATACA
GTGCACTACCCTTTTAGGTTCCGCACCTCTTGTGCTGCAGGTGGTGTGCTGGTACACGAATAAACTGACTAAAAATGTCCCGGAGCGTGACCAA
AAGCAACATGACCGATGACAAGGCATTAATTTATGCGGCACAACAGGGGCGAGTCTCGGTAGCCAGCTTCAGTCGCGATCTCTGAACGGCGATTAC
GCGAAAGATACCGCTCTTGGTATCGCTGGTAACCAGGCTTCGTCACAGTTGCAGGCGCTGGTTACAACATTATGGAACGGCAGAGGTTAATCTGCAGA
GTGGTAATAACTTTGACGGTAGTTCACTGGACTTCTTATTACCGTTCTATGATTCCGAAAAAATGCTGGCATTGGTCAAGGTCGGAGCGCGTTACAT
TGACTCCCGCTTTACGGCAAATTTAGGTGCGGGTCCAGCGTTTTTTCCCTTCCTGCAAACATGTTGGGCTATAACGTTCTCATTGATCAGGATTTTTCT
GGTGATAATACCGTTTTAGGTATGGTGGCGAATACTGGCAGACTATTTCAAAGTAGCGTTAACGGCTATTTCCGATGAGCGGCTGGCATGAGT
CATACAATAAGAAAGACTATGATGAGCGCCAGCAAATGGCTTCGATATCCGTTTTAAATGGCTATCTACCGTCATATCCGGCATTAGGCGCCAAGCT
GATATATGAGCAGTATTATGGTGATAATGTTGCTTTGTTAATCTGATAAGTGCAGTCGAATCCTGGTGGCGGACCGTTGGTGTAACCTATACT
CCGATTCCCTCTGGTGACGATGGGGATCGATTACCGTCATGGTACGGGTAATGAAAATGATCTCCTTTACTCAATGCAGTTCGGTTATCAGTTTGATA
AATCGTGGTCTCAGCAAATGAACCACAGTATGTTAACGAGTTAAGAATTTATCAGGCAGCCGTTACGATCTGGTTCAGCGTAATAACAATATTAT
TCTGGAGTACAAGAAGCAGGATATCTTCTCTGAATATCCCGCATGATTAATGGTACTGAACACAGTACGCAGAAGATTCAGTTGATCGTTAAG
AGCAAATACGGTCTGGATCGTATCGTCTGGGATGATAGTGCATTACGCAGTCAGGGCGGTGAGTTACGATAGCGGAAGCCAAAGCCACAGACT
ACCAGGCTATTTTGCCTGCTTATGTGCAAGGTGGCAGCAATATTTATAAAGTACGGCTCGCGCCTATGACCGTAATGGCAATAGCTCTAACAATGT
ACAGCTTACTATTACCGTTCTGTGCAATGGTCAAGTTGTCAGCAGGTTGGGTAACGGACTTACGGCGGATAAGACTTCGGCTAAAGCGGATAAC
GCCGATACCATTACTTATACCGCGACGGTGA AAAAGAAATGGGGTAGCTCAGGCTAATGTCCCTGTTTCATTTAATATTGTTTCAGGAAGTGCAACTC
TTGGGGCAAATAGTGCCAAAACGGATGCTAACGGTAAGGCAACCGTAACGTTGAAGTGCAGTACGCCAGGACAGGTCGTCGTCTGCTAAAACCCG
GGAGATGACTTCAGCACTTAATGCCAGTGGCGTTATATTTTTTGATGGTGGCGCGGTGCCGATCCGATCCGCTGGAACCGGCCAGCCGGCCCA
GGTGCAGCTCGTGGAGTCTGGGGGAGGCTTGGTGCAGCCTGGGGGGTCTCTGAGACTCTCCTGCGCAGCCTCTGGATTTAGT
TTGGAATATTATGGCATCGGCTGGTTCGCCAGGCCCCAGGGAAGGAGCGTGAGGGGGTTCGCATGTATTAGTAGTAGTGGT
```

**GACGCACAAACATTAGAGAAGGGCGATTACCATCTCCAGAGACAACGCCGAGAACACGGTGTATCTGCAACTGAACAGCCTG**  
**AAACCTGAGGACACAGCCATTTATTACTGTGCAGCAGCTCCCAATACATTTGCGGTACTTACCGGTACACGGCGTTTCGTACC**  
**TGGGGCCAGGGGACCCAGGTCACCGTCTCCTCGGAACCCAAGACACCAAAACCACAAGACGGCCAGGGCCGGCCAG** GCGGCCG  
 CCG**GAACAAAAACTCATCTCAGAAGAGGAT**GCAGCTGCATAAAAAGCTTGACCTGTGAAGTGAAAAATGGCGCACATTGTGCGACATTTTTTTTTGCTG  
 CCGTTTACCGCTACTGCTCACGGATCCCCACGCGCCCTGTAGCGGCGCATTAAGCGCGGCGGGTGTGGTGGTTACGCGCAGCGTGACCGCTACACT  
 TGCCAGCGCCCTAGCGCCCGCTCCTTTTCGCTTTCTTCCCTTCTTTTCGCCACGTTTCGCGGCTTTCCCCGTCAAGCTCTAAATCGGGGCATCCCT  
 TTAGGGTTCGGATTTAGTGCTTTACGGCACCTCGACCCCAAAAACTTGATTAGGGTGATGGTTCACGTAGTGGGCCATCGCCCTGATAGACGGTTT  
 TTCGCCCTTTGAGTTGGAGTCCACGTTCTTTAATAGTGGACTCTTGTCCAACTGGAACAA**CACTCAACCCTATCTCGGTCTATTCTTTGATTT**  
**ATAAGGGATTTGCGGATTTGCGCTATTGGTTAAAAAATGAGCTGATTTAACAAAAATTTAACGCGAATTTAACAAAAATTAACGTTTACAATT**  
**TCAGTGGCACTTTTCGGGAAATGTGCGCGGAACCCCTATTTGTTTTATTTTCTAAATACATTCAAATATGTATCCGCTCATGTGAGACGTTGGG**  
**TGAGGTTCCAACTTTACCATAATGAAATAAGATCACTACCGGCGTATTTTGTGAGTTATCGAGATTTTCAGGAGCTAAGGAAGCTAAAATGGAGA**  
**AAAAATCACTGGATATACCACCGTTGATATACTCCAAATGGCATCGTAAAGAACATTTTGAGGCATTTTCAGTCAGTTGCTCAATGTACCTATAACCA**  
**GACCGTTCAGCTGGATATACGGCCTTTTAAAGACCGTAAAGAAAAATAAGCACAAGTTTATCCGGCCTTATTACCATTTTCGCCGCTGATG**  
**AATGCTCATCCGGAGTTCGGTATGGCAATGAAAGACGGTGAGCTGGTATATGGGATAGTGTTCACCCCTGTTACACCGTTTTCCATGAGCAAAC**  
**AAACGTTTTTCATCGCTCTGGAGTGAATACCACGACGATTTCCGGCAGTTTCTACACATATATTCGCAAGATGTGGCGTGTACGGTGAACCTGGC**  
**CTATTTCCCTAAAGGTTTATTGAGAAATGTTTTTCGTCTCAGCCAATCCCTGGGTGAGTTTACCAGTTTTGATTTAAACGTGGCCAATATGGAC**  
**AACTTCTCGCCCCGTTTTTACCATGGGCAATATTATACGCAAGGCGACAAGGTGCTGATGCCGCTGGCGATTTCAGGTTTCATGATGCCGCTGTG**  
**ATGGCTTCCATGTCCGCGAATGCTTAATGAATTACAACAGTACTGCGATGAGTGGCAGGGCGGGCGTAA**TTTTTTTAAAGCAGTTATTGGTGCCC  
 TTAACGCCTGGTGTACGCCTGAATAAGTGATAATAAGCGGATGAATGGCAGAAATTCGAAAGCAAATTCGACCCGGTCTGCGGTTTCAGGGCAGGG  
 TCGTTAAATAGCCGCTTATGTCTATTGTCTGTTTACCAGTTTTATTGACTACCGGAAGCAGTGTGACCGTGTGCTTCTCAAATGCCTGAGGCCAGTTT  
 GCTCAGGCTCTCCCCGTGGAGGTAATAATTGCTCGACATGACCAAAATCCCTTAACGTGAGTTTTCGTTCCACTGAGCGTCAGACCCCGTAGAAAAG  
 ATCAAAGATCTTCTTGAGATCCTTTTTTCTGCGGTAATCTGCTGCTTGCAAACAAAAAACACCGCTACCAGCGGTGGTTTGTGTTGCCGATC  
 AAGAGTACCAACTCTTTTTCCGAAGGTAACCTGGCTTCAGCAGAGCGCAGATACCAAAATCTGCTTCTAGTGTAGCCGTAGTTAGGCCACCACTT  
 CAAGAACTCTGTAGCACCGCCTACATACCTCGCTCTGTAATCCTGTTACCAGTGGCTGCTGCCAGTGGCGATAAGTCGTGTCTTACCAGGTTGGAC  
 TCAAGACGATAGTTACCGGATAAGGCGCAGCGTTCGGGCTGAACGGGGGTTTCGTGCACACAGCCAGCTTGGAGCGAACGACCTACACCGAACTGA  
 GATACCTACAGCGTGAGCTATGAGAAAGCGCCACGCTTCCCGAAGGGAGAAAGGCGGACAGGTATCCGGTAAGCGGCAGGGTTCGGAACAGGAGAGCG  
 CACGAGGGAGCTTCCAGGGGAAACGCCTGGTATCTTTATAGTCTGTGCGGTTTCGCCACCTGACTTGAGCGTCGATTTTTGTGATGCTCGTCA  
 GGGGGCGGAGCCTATGAAAAACGCCAGCAACCGGCTTTTTACGGTTCCTGGCCTTTTGTGGCCTTTTGCTCACATG

## pNV3PBA V2 and V4

The original promoter and RBS in the pNV3PBA were replaced with promoters from Anderson promoter collection<sup>4</sup> and RBS using RBS calculator developed by Salis<sup>5</sup> for constitutive expression of VHH3PBA. These BioBrick sequences can be found in Table S1.

**Table S1.** Sequences of synthetic promoters and RBSs.

| Construct                     | Sequence                                                    |
|-------------------------------|-------------------------------------------------------------|
| V2 (J23105 promoter-RBS(12k)) | <b>TTTACGGCTAGCTCAGTCCTAGGTA</b> CTATGCTAGCAAAGGAA<br>ATCTA |
| V4 (J23101 promoter-RBS(12k)) | <b>TTTACAGCTAGCTCAGTCCTAGG</b> TATTATGCTAGCAAAGGAA<br>ATCTA |



## pAmilCP

J23104 promoter-RBS(B0034)-T-amilCP-B0010-rrnB T2 terminator-AmpR-p15A ori

GATAACATCAAAATTGACAGCTAGCTCAGTCTAGGTATTGTGCTAGTACTAGAGAAAGAGGAGAAA TACTAGATGAGTGTGATCGCTAAACAAAT  
GACCTACAAGGTTTATATGT CAGGCACGGTCAATGGACACTACTTTGAGGTCGAAGGCGATGGAAAAGGTAAGCCCTACGAGGGGAGCAGACGGTA  
AAGCTCACTGTCAACCAAGGGCGACCTCTGCCATTTGCTTGGGATATTTTATCACCACAGTGT CAGTACGGAAGCATAACCATTCCAAGTACCCTG  
AAGACATCCCTGACTATGTAAAGCAGTCATTTCCGGAGGGCTATACATGGGAGAGGATCATGAACTTTGAAGATGGTGCAGTGTGTACTGT CAGCAA  
TGATTCCAGCATCCAAGGCAACTGTTTCATCTACCATGTCAAGTTCTCTGGTTGAACTTTCCCTCCAATGGACCTGT CATGCAGAAGAAGACACAG  
GGCTGGGAACCCAACTGAGCGTCTCTTTGCACGAGATGGAATGCTGCTAGGAAACAACCTTATGGCTCTGAAGTTAGAAGGAGGGCGTCACTATT  
TGTGTGAATTTAAAACACTTTACAAGGCAAAGAAGCCGTGGAAGATGCCAGGGTATCACTATGTTGACCGCAAACCTGGATGTAACCAATCACAACAA  
GGATTACACTTCGGTTGAGCAGTGTGAAATTTCCATTGCACGCAAACCTGTGGTTCGCCTAATAA TACTAGTAGCGGCCGCTGCAGTGGCGGATGAGA  
GAAGATTTT CAGCTGATACAGATTAATCAGAACGCAGAAGCGGTCTGATAAAAAGAAATTTGCCTGGCGGCAGTAGCGGGTGGTCCCACCTGAC  
CCCATGCCGAACTCAGAAGTGAAACGCCGTAGCGCCGATGGTAGTGTGGGTCTCCCATGCGAGAGTAGGGAACCTGCCAGGCATCAAATAAAACGA  
AAGGCTCAGTCGAAAGACTGGGCCTTTTCGTTTTATCTGTGTTTGTGCGGTGAACGCTCTCCTGAGTAGGACAAATCGCCGGGAGCGGATTTGAACG  
TTGCGAAGCAACGGCCCGGAGGGTGGCGGGCAGGACGCCCCGATAAACTGCCAGGCATCAAATTAAGCAGAAGGCCATCTGACGGATGGCCTTTT  
TGCCTTTCTACAAACTCTTTTTGTTTTATTTCAATCAAATATGTATCCGCTCATGAGACAATAACCCTGATAAATGCTTCAATAATATGAAAAAGGA  
AGAGTATGAGTATTCAACATTTCCGTGTCGCCCTTATTCCTTTTTTGCGGCATTTCCTTCTGTTTTTGTCTACCCAGAAACGCTGGTGAAAGT  
AAAAGATGCTGAAGATCAGTTGGGTGCACGAGTGGGTACATCGAACTGGATCTCAACAGCGGTAAGATCCTTGAGAGTTTTCGCCCCGAAGAACGT  
TTTCCAATGATGAGCACTTTTAAAGTTCTGCTATGTGGCGCGGTATTATCCCGTGTGACCGCGGGCAAGAGCAACTCGGTGCGCCGATACACTATT  
CTCAGAATGACTTGGTTGAGTACTCACCAGTACAGAAAAGCATCTTACGGATGGCATGACAGTAAGAGAATTATGCAGTGTGCCATAACCATGAG  
TGATAACACTGCGGCCAACTTACTTCTGACAACGATCGGAGGACCGAAGGAGCTAACCCTTTTTTGCAACAACATGGGGGATCATGTAACCTCGCCTT  
GATCGTTGGGAACCGGAGCTGAATGAAGCCATACCAAACGACGAGCGTGACACCACGATGCCTGTAGCAATGGCAACAACGTTGCGCAAACTATTA  
CTGGCGAACTACTTACTCTAGCTTCCCGGCAACAATTAATAGACTGGATGGAGGCGGATAAAGTTGCAGGACCACTTCTGCGCTCGGCCCTTCCGGC  
TGGCTGGTTTTATTGCTGATAAATCTGGAGCCGGTGGAGCGTGGTCTCGCGGTATCATTGCAGCACTGGGGCCAGATGGTAAGCCCTCCCGTATCGTA  
GTTATCTACACGACGGGAGTCAAGCAACTATGGATGAACGAAATAGACAGATCGCTGAGATAGGTGCTCCTCACTGATTAAGCATTTGGTAACTGTGCA  
GCTCGCTTGGACTCCTGTTGATAGATCCAGTAATGACCTCAGAACTCCATCTGGATTTGTTTCAGAACGCTCGGTTGCCCGGGCGTTTTTTATTGG  
TGAGAATCCAAGCACTAGTAACAACCTTATATCGTATGGGGCTGACTTCAGGTGCTACATTTGAAGAGATAAATGCACTGAAATCTAGTAATATTTT  
ATCTGATTAATAAGATGATCTTCTT GAGATCGTTTTGGTCTGCGCGTAATCTCTTGCTCTGAAAACGAAAAACCGCCTTGCAGGGCGGTTTTTTCGA  
AGGTTCTCTGAGCTACCAACTCTTTGAACCGAGGTAACCTGGCTTGGAGGAGCGCAGTACCAAACCTTGTCCCTTTCAGTTTAGCCTTAACCGGCGCA  
TGACTTCAAGACTAACTCCTCTAAATCAATTACCAGTGGCTGCTGCCAGTGGTGTCTTTTGCATGTCTTTCCGGGTTGGACTCAAGACGATAGTTACC  
GGATAAGGCGCAGCGGTGGACTGAACGGGGGTTTCGTGCATACAGTCCAGCTTGGAGCGAACTGCCTACCCGGAACCTGAGTGT CAGGCGTGGAAATG  
AGACAAACGCGGCCATAACAGCGGAATGACACCGGTAACCGAAAGGCAGGAACAGGAGAGCGCACGAGGGAGCCGCCAGGGGAAACGCCTGGTAT  
CTTTATAGTCTGTCGGGTTTTCGCCACCCTGATTTGAGCGTCAGATTTCTGTGATGCTTGT CAGGGGGCGGAGCCTATGGAAAACACGGCTTTGCCG  
CGCCCTCTCACTTCCCTGTTAAGTATCTTCTTGGCATCTTCCAGGAAATCTCCGCCCGTTCGTAAGCCATTTCCGCTCGCCGAGTGAACGACC  
GAGCGTAGCGAGTCACTGAGCGAGGAAGCGGAATATATCCCTAGGTCTAGGGCGGGGATTTGTCCTACTCAGGAGAGCGTTACCCGACAAACAA  
AGATAAAACGAAAGGCCAGTCTTTCGACTGAGCCTTTTCGTTTTATTGATGCCTCTAGATTATTG

## Supplementary references

- 1 Shan, G. *et al.* A sensitive class specific immunoassay for the detection of pyrethroid metabolites in human urine. *Chemical research in toxicology* **17**, 218-225, doi:10.1021/tx034220c (2004).
- 2 Salema, V. *et al.* Selection of single domain antibodies from immune libraries displayed on the surface of E. coli cells with two beta-domains of opposite topologies. *PLoS one* **8**, e75126, doi:10.1371/journal.pone.0075126 (2013).
- 3 Kim, H.-J. *et al.* Isolation of Alpaca Anti-Hapten Heavy Chain Single Domain Antibodies for Development of Sensitive Immunoassay. *Analytical chemistry* **84**, 1165-1171, doi:10.1021/ac2030255 (2012).
- 4 Anderson, J. C. Registry of Standard Biological Parts [parts.igem.org]. (2009).
- 5 Salis, H. M. The ribosome binding site calculator. *Methods in enzymology* **498**, 19-42, doi:10.1016/B978-0-12-385120-8.00002-4 (2011).
